# Supplementary material
Source: PubMed Central journal article supplement (PMC4862702)
Supplement: IAI.01522-15_zii999091683so1.pdf [file IAI.01522-15_zii999091683so1.pdf]

**Supplementary Table 1: Longitudinal cell counts in 150 and 1,800 pRBC infection.**

Values show the median and [interquartile range]. \* significance  $p \leq 0.05$ , \*\*  $p \leq 0.005$ , \*\*\*  $p < 0.0001$  compared to day 0 (baseline).

|                                                         | 150 pRBC       |                 |                |                |                |                | 1,800 pRBC     |                |                |                 |                  |
|---------------------------------------------------------|----------------|-----------------|----------------|----------------|----------------|----------------|----------------|----------------|----------------|-----------------|------------------|
|                                                         | Day 0          | Day 7           | Day 9          | Day 10         | Day 11         | 24h post Rx    | Day 0          | Day 6          | Day 7          | Day 8           | 24h post Rx      |
| <b>Participants</b>                                     | 6              | 6               | 6              | 6              | 6              | 6              | 21             | 7              | 21             | 14              | 14               |
| <b>WCC (<math>10^3</math>/mL)</b>                       | 7.35 [6.1-8.0] | 6.75 [6.4-7.4]  | 6.95 [6.1-7.8] | 6.9 [6.4-7.4]  | 6.1 [5.6-7.2]  | 6.2 [5.0-7.2]  | 5.5 [4.8-6.5]  | 5.8 [4.5-9.3]  | 5.75 [5.0-6.4] | 5.0 [4.1-6.3]   | 5.0* [3.9-5.6]   |
| <b>Monocyte (<math>10^3</math>/mL)</b>                  | 0.3 [0.9-0.4]  | 0.88* [0.6-1.3] | 0.48 [0.3-0.6] | 0.55 [0.3-0.7] | 0.68 [0.5-1.3] | 0.4 [0.2-0.6]  | 0.46 [0.4-0.6] | 0.40 [0.3-0.6] | 0.45 [0.4-0.6] | 0.50 [0.4-0.7]  | 0.50 [0.3-0.5]   |
| <b>Lymphocyte (<math>10^3</math>/mL)</b>                | 2.1 [1.7-2.3]  | 2.05 [1.9-2.6]  | 2.15 [1.9-2.6] | 2.05 [2.0-2.3] | 1.85 [1.5-2.1] | 1.55 [1.3-1.8] | 1.98 [1.6-2.3] | 2.1 [1.8-2.2]  | 1.8 [1.6-1.9]  | 1.4** [1.2-1.8] | 1.2*** [0.8-1.7] |
| <b>CD4<sup>+</sup> T cells/ <math>\mu</math>L blood</b> | 843 [724-1112] | 891 [766-1200]  | 926 [801-1169] | 945 [844-1033] | 771 [712-944]  | 734 [530-806]  | 800 [687-1100] | 973 [673-1101] | 798 [597-1012] | 727** [517-808] | 505*** [425-753] |
| <b>B cells/ <math>\mu</math>L blood</b>                 | 247 [171-345]  | 246 [170-355]   | 292 [172-403]  | 278 [182-373]  | 254 [159-339]  | 158 [120-300]  | 263 [186-382]  | 274 [212-359]  | 277 [152-323]  | 251 [119-448]   | 167*** [86-229]  |
| <b>NK cells/ <math>\mu</math>L blood</b>                | 218 [97-273]   | 195 [111-302]   | 235 [190-370]  | 215 [164-248]  | 144 [91-221]   | 165 [105-276]  | 114 [75-126]   | 131 [119-197]  | 92 [67-196]    | 47* [22-119]    | 27*** [16-90]    |

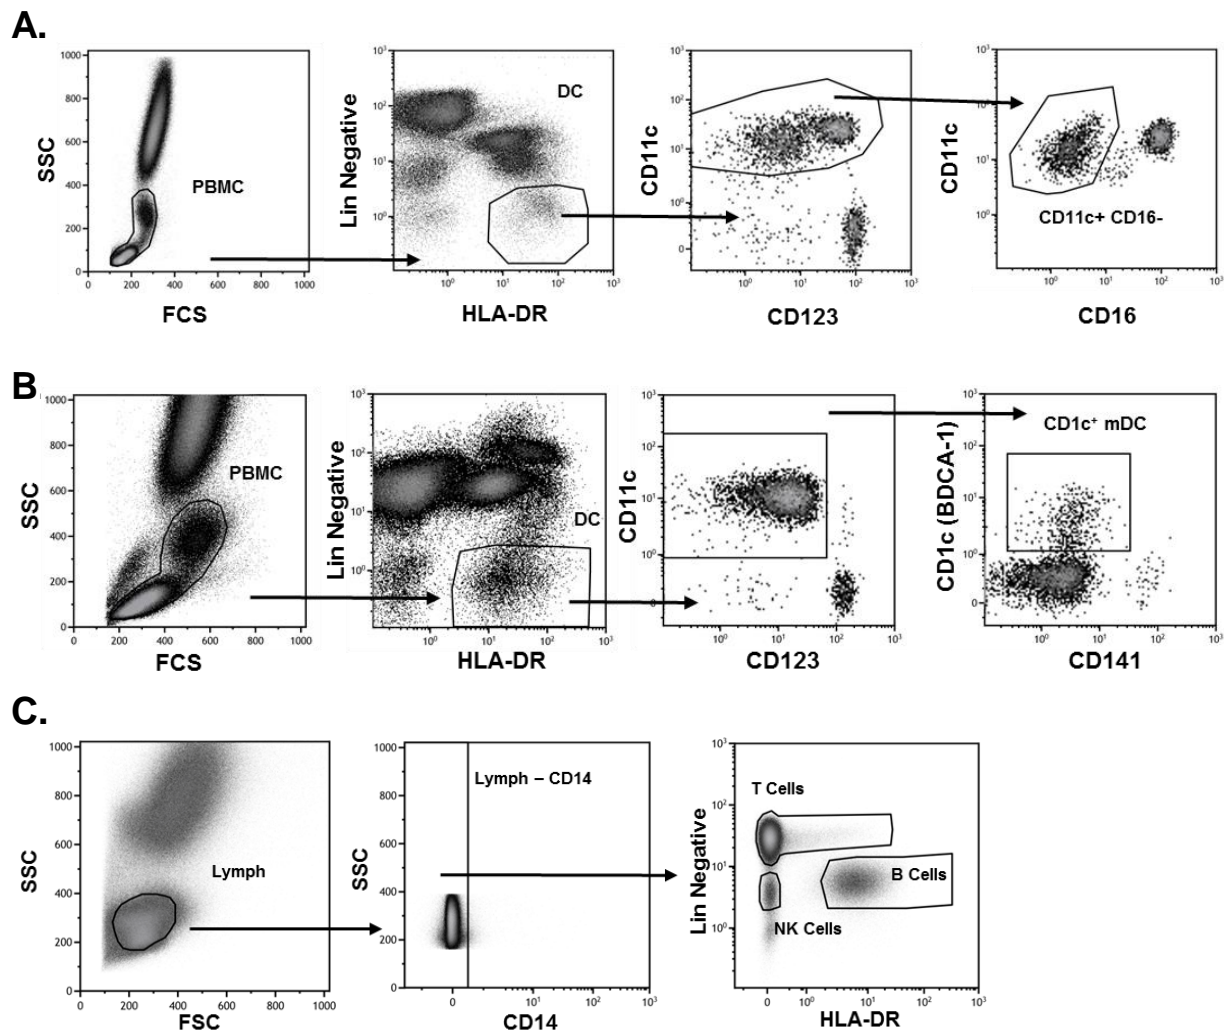

**S1 Fig. CD1c<sup>+</sup> mDC whole blood gating strategy.** **A.** In the 150 pRBC cohort CD1c<sup>+</sup> mDC were identified as negative for lineage markers (CD3, 14, 19, 20, 56 and 34), HLA-DR<sup>+</sup> (2<sup>nd</sup> panel), CD11c<sup>+</sup> (3<sup>rd</sup> panel), CD16<sup>-</sup> (4<sup>th</sup> panel), back gating was also used to ensure CD11c<sup>+</sup> CD16<sup>-</sup> cells were not CD141<sup>+</sup> (data not shown). **B.** In the 1,800 pRBC cohort CD1c<sup>+</sup> mDC were identified as negative for lineage markers (CD3, 14, 19, 20, 56 and 34), HLA-DR<sup>+</sup> (2<sup>nd</sup> panel), CD11c<sup>+</sup> (3<sup>rd</sup> panel) and CD1c<sup>+</sup> (4<sup>th</sup> panel). **C.** T cells, B cells and NK cells were gated by FSC and SSC properties (left panel), CD14 negative (middle panel) and differentiated by HLA-DR expression (right panel).

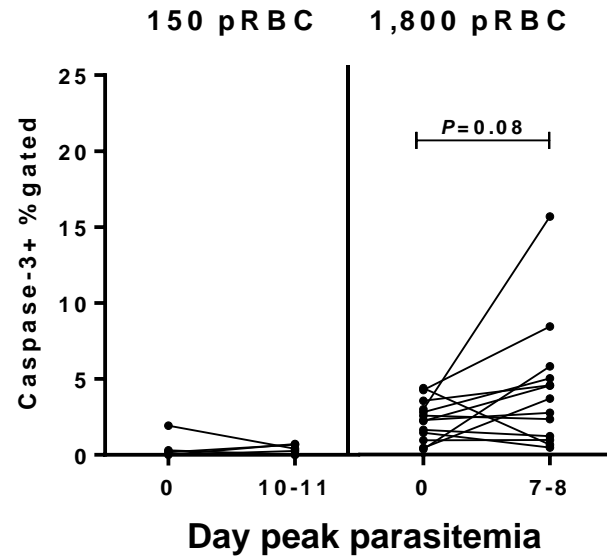

**S2 Fig. Active caspase-3 staining.** Percentage of CD1c<sup>+</sup> mDC positive for active caspase-3 after 150 pRBC (12 participants) or 1,800 pRBC (13 participants) experimental infection. The Wilcoxon matched-paired test was used for comparison between day 0 and day 10-11 or day 7-8.

**A.**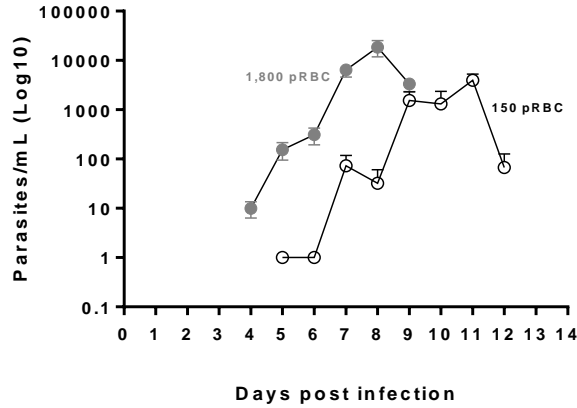**B.**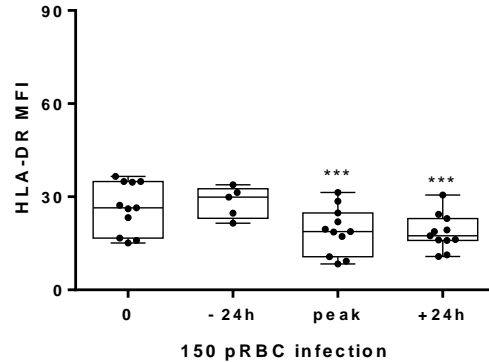**C.**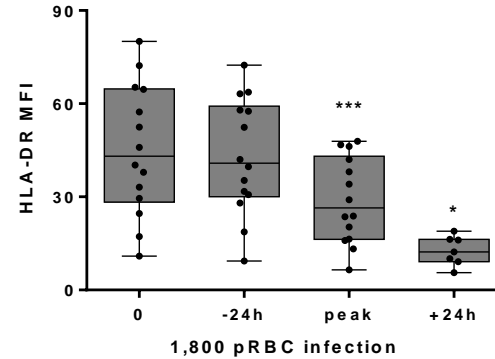

**S3 Fig. Longitudinal HLA-DR expression.** **A.** Parasitemia of participants whom longitudinal HLA-DR expression on CD1c<sup>+</sup> mDC was assessed. Mean parasitemia +/- standard error is presented, 150 pRBC (white circles) or 1,800 pRBC (grey circles). **B.** Longitudinal HLA-DR MFI on CD1c<sup>+</sup> mDC post 150 pRBC infection (n=12), -24h mean parasitemia 1307/mL, median parasitemia 87/ mL [IQR 1-719]. **C.** Longitudinal HLA-DR MFI on CD1c<sup>+</sup> mDC post 1,800 pRBC infection (n=14; except +24h, n=7), -24h mean parasitemia 6651/mL, median parasitemia 4511 [943-12900]. Box plot show the minimum, maximum, median and interquartile range for data from all subjects. The Wilcoxon matched-paired test was used for comparison between day 0, -24h, peak and +24h.

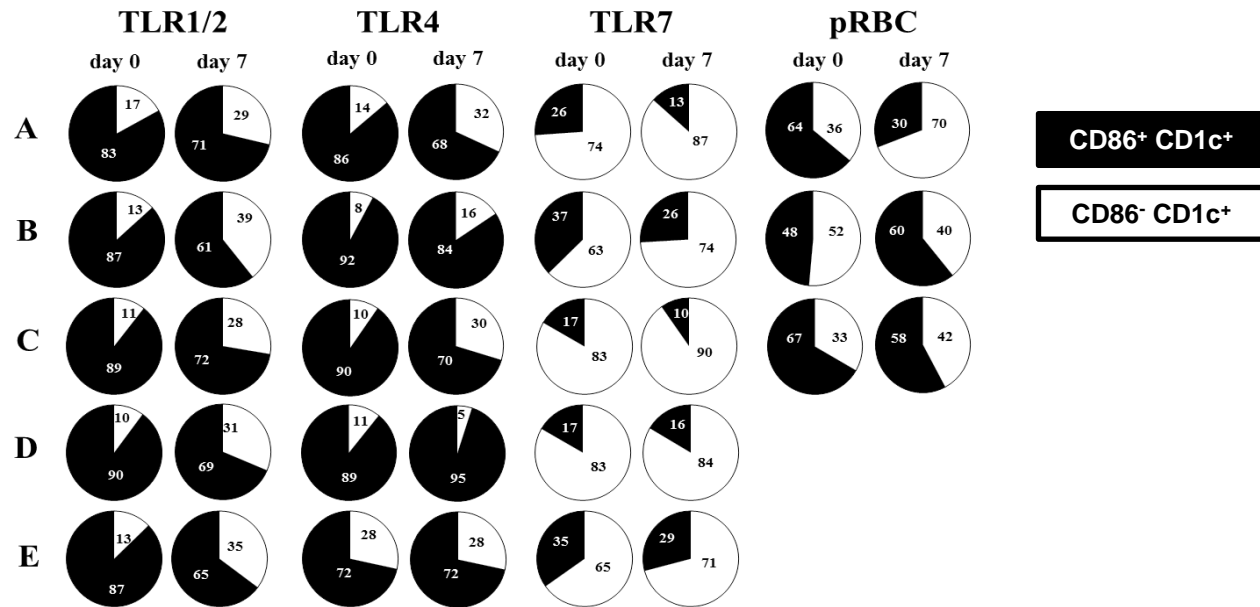

**S4 Fig. CD86 expression on CD1c<sup>+</sup> mDC producing TNF to TLR ligands or pRBC.** Pie charts show the proportion of TNF producing CD1c<sup>+</sup> mDC which are CD86 positive (black fill) or CD86 negative (white fill) in participants administered 1,800 pRBC who had adequate CD1c<sup>+</sup> mDC TNF production ( $\geq 30$  events). CD86<sup>-</sup> CD1c<sup>+</sup> mDC increased in proportion on day 7, at peak parasitemia after TLR stimulation (exception pRBC),  $p=0.06$ . Each line of pie charts (A-E) represents one subject participating in the trial. Only A-C had adequate TNF events to be analysed for CD86 expression following pRBC stimulation. The Wilcoxon matched-paired test was used for comparison between day 0 and day 7.
